# Supplementary material
Source: PubMed Central journal article supplement (PMC9021979)

## Supplemental Online Content

Zhou ES, Ritterband LM, Bethea TN, Robles YP, Heeren TC, Rosenberg L. Effect of culturally tailored, internet-delivered cognitive behavioral therapy for insomnia in Black women: a randomized clinical trial. *JAMA Psychiatry*. Published online April 20, 2022.  
doi:10.1001/jamapsychiatry.2022.0653

**eFigure.** Participant changes in insomnia severity and sleep efficiency across study time points

This supplementary material has been provided by the authors to give readers additional information about their work.

**eFigure.** Participant changes in insomnia severity and sleep efficiency across study time points

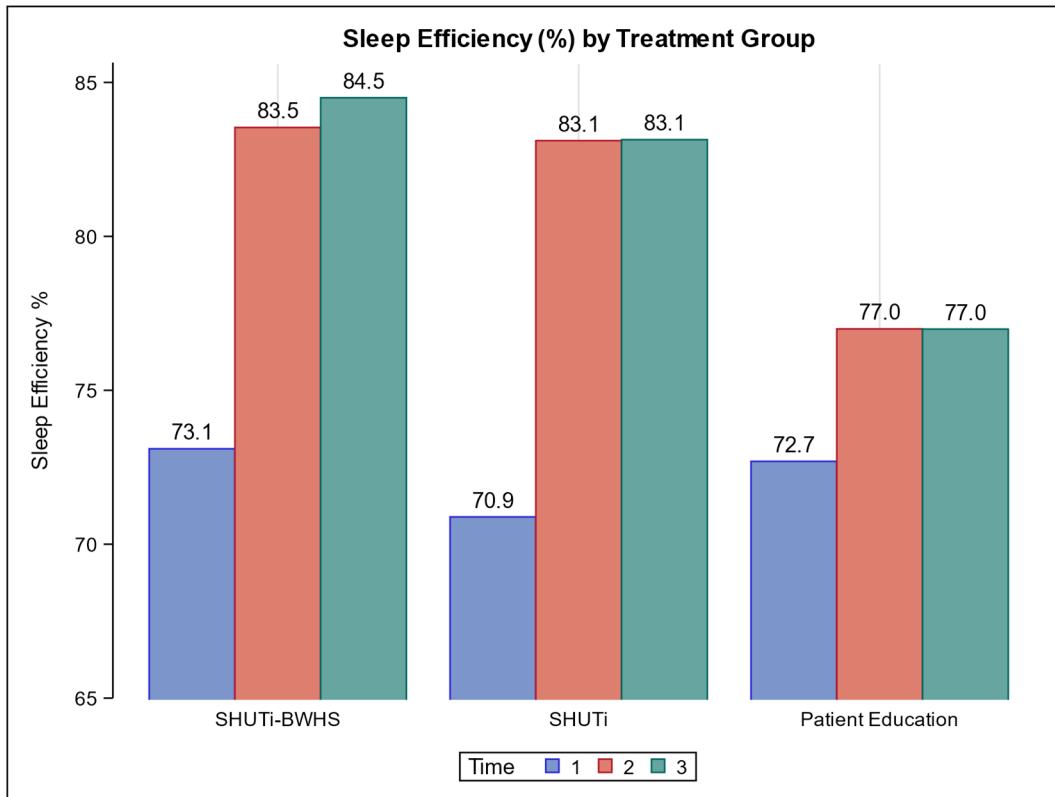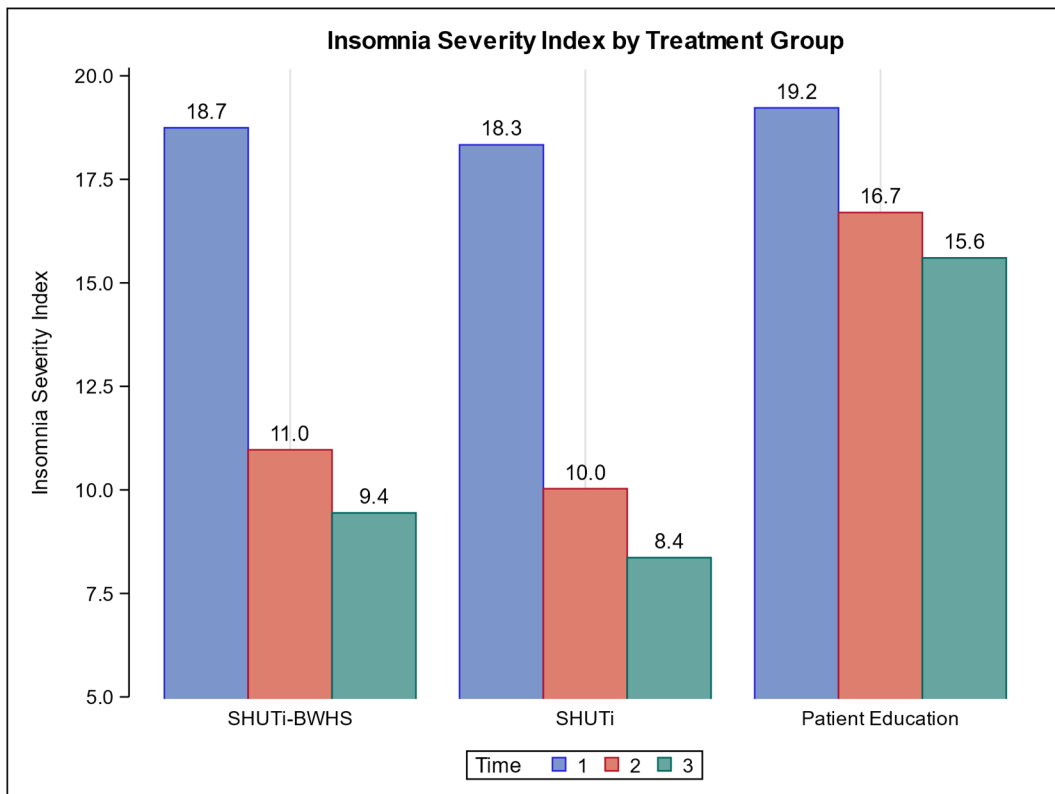

Supplement: jamapsychiatry-e220653-s002.pdf [file jamapsychiatry-e220653-s002.pdf]
