# Supplementary material
Source: PubMed Central journal article supplement (PMC9021979)
Supplement: jamapsychiatry-e220653-s003.pdf [file jamapsychiatry-e220653-s003.pdf]

## Data Sharing Statement

Zhou. Effect of Culturally Tailored, Internet-Delivered Cognitive Behavioral Therapy for Insomnia in Black Women. *JAMA Psychiatry*. Published April 20, 2022.  
doi:10.1001/jamapsychiatry.2022.0653

### Data

**Data available:** No

### Additional Information

**Explanation for why data not available:** Deidentified participant data can be made available upon review of the request by the study's co-principal investigators (Drs. Zhou and Rosenberg).
